# Supplementary material for: Influence of modification of Ti3C2 MXene with ceramic oxide and noble metal nanoparticles on its antimicrobial properties and ecotoxicity towards selected algae and higher plants
Source: PubMed Central journal article supplement — RSC Adv. 2019 Jan 30;9(8):4092–105. doi: 10.1039/c8ra07633b (PMC9060548; doi:10.1039/c8ra07633b), 2019-01-30
Supplement: RA-009-C8RA07633B-s001.pdf [file RA-009-C8RA07633B-s001.pdf]

## SUPPORTING INFORMATION

Influence of  $Ti_3C_2$  MXene modification with ceramic oxide and noble metal nanoparticles on its antimicrobial properties and ecotoxicity towards selected algae and higher plants

A. Rozmysłowska-Wojciechowska, E. Karwowska, S. Poźniak, T. Wojciechowski, L. Chlubny, A. Olszyna, W. Ziemkowska, A. M. Jastrzębska

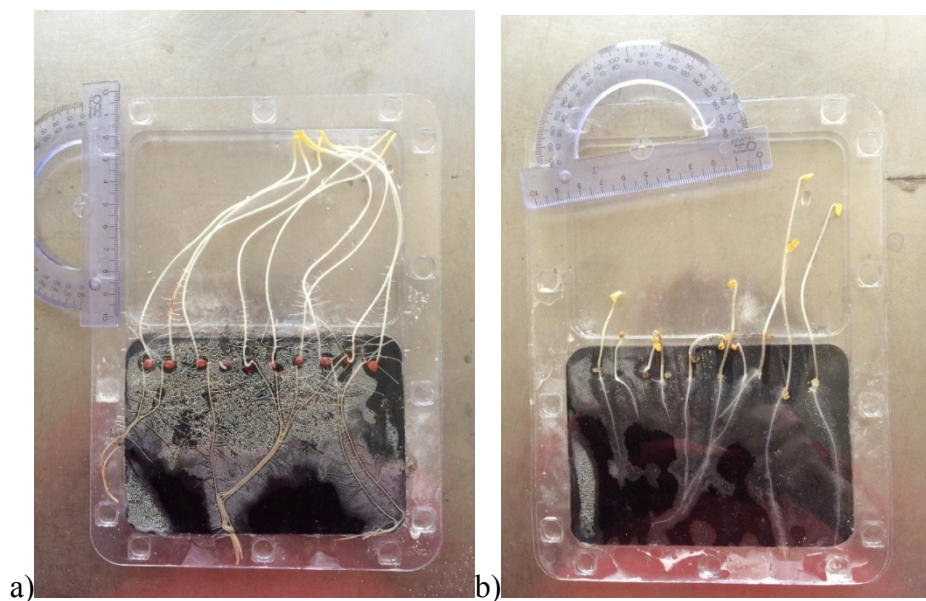

**Fig. S1** Growth of the *Sorghum saccharatum* (a) and *Sinapsis alba* (b) without presence of any addition (reference sample).

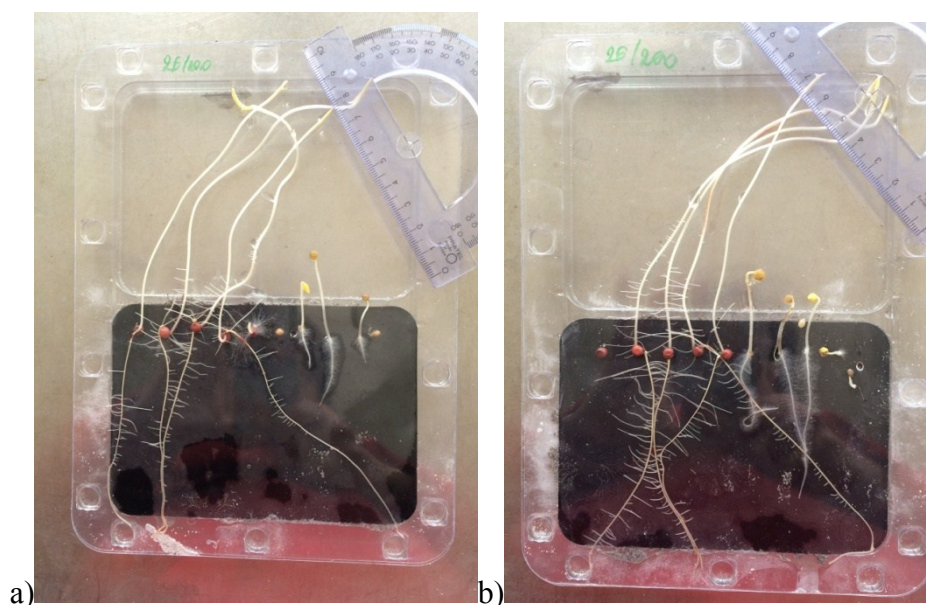

**Fig. S2** Growth of the *Sorghum saccharatum* (a) and *Sinapsis alba* (b) in the presence of  $Ti_3C_2$  MXene in concentration of 100 mg/kg.

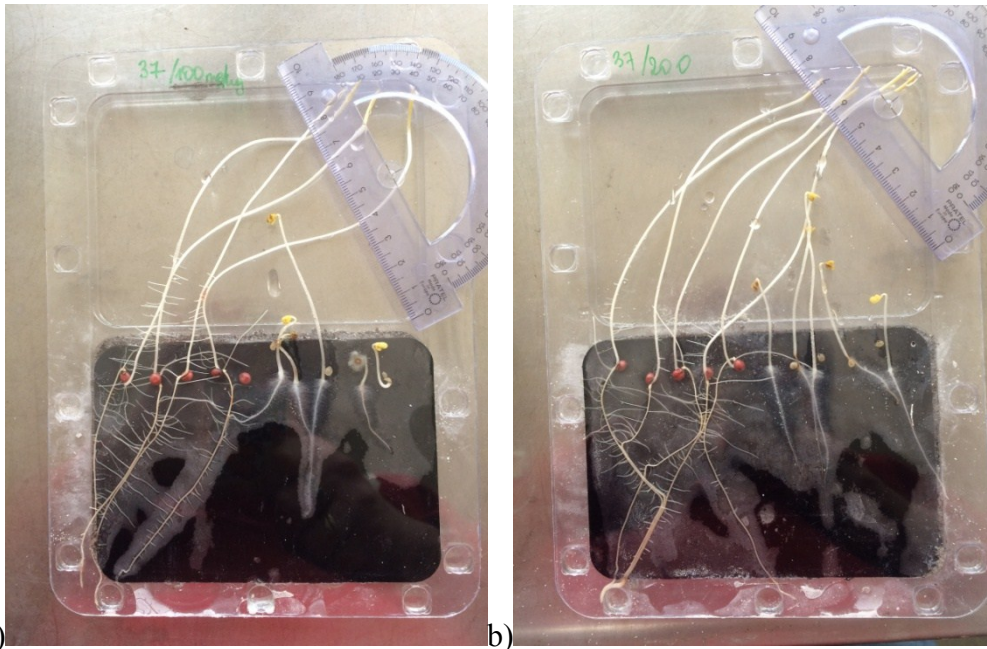

a) b)  
**Fig. S3** Growth of the *Sorghum saccharatum* (a) and *Sinapsis alba* (b) in the presence of Ti<sub>3</sub>C<sub>2</sub>/3%Al<sub>2</sub>O<sub>3</sub>/2%Ag nanocomposite in concentration of 100 mg/kg.

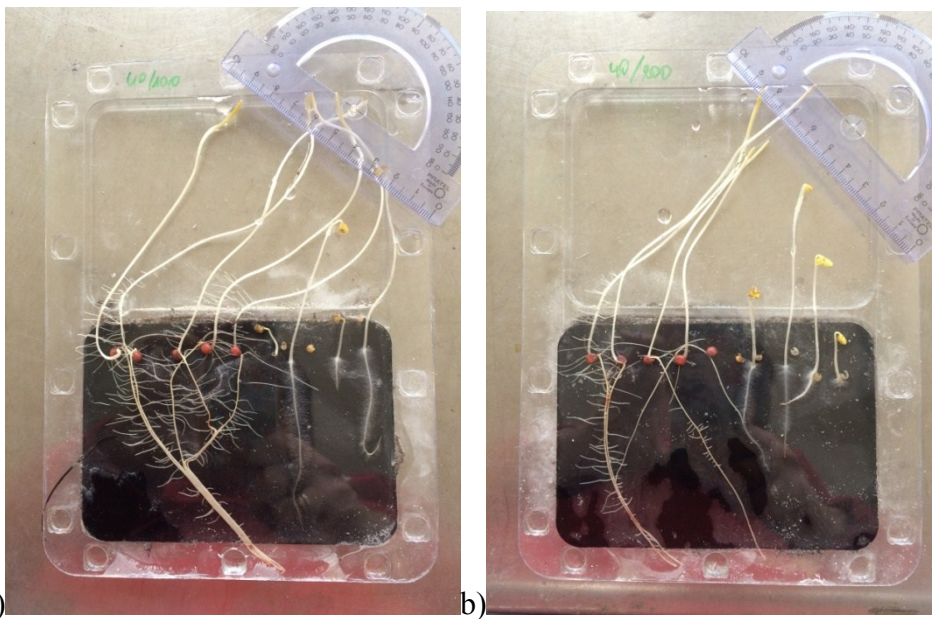

a) b)  
**Fig. S4** Growth of the *Sorghum saccharatum* (a) and *Sinapsis alba* (b) in the presence of Ti<sub>3</sub>C<sub>2</sub>/3%SiO<sub>2</sub>/2%Ag nanocomposite in concentration of 100 mg/kg.

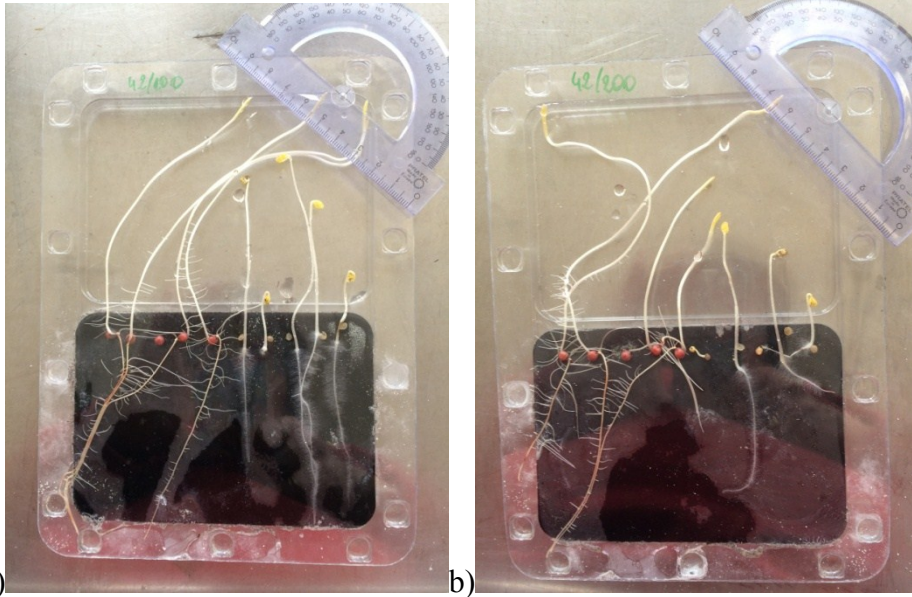

a) b)  
**Fig. S5** Growth of the *Sorghum saccharatum* (a) and *Sinapsis alba* (b) in the presence of  $\text{Ti}_3\text{C}_2/3\%\text{SiO}_2/2\%\text{Pd}$  nanocomposite in concentration of 100 mg/kg.
